# Supplementary material for: Selective and sensitive determination of capsaicin using polymelamine formaldehyde decorated over carbon nanotubes
Source: Royal Society of Chemistry journal article supplement (doi:10.1039/d2ma00206j), 2022-01-01
Supplement: d2ma00206j1.pdf [file d2ma00206j1.pdf]

## Supporting Information

### Selective and Sensitive determination of capsaicin using Polymelamine formaldehyde decorated over carbon nanotubes

Daisy Mehta<sup>a</sup>, Neha Thakur<sup>a</sup> and Tharamani C. Nagaiah<sup>a</sup> \*

<sup>a</sup>. Department of Chemistry Indian Institute of Technology Ropar Rupnagar, Punjab-140001, India.

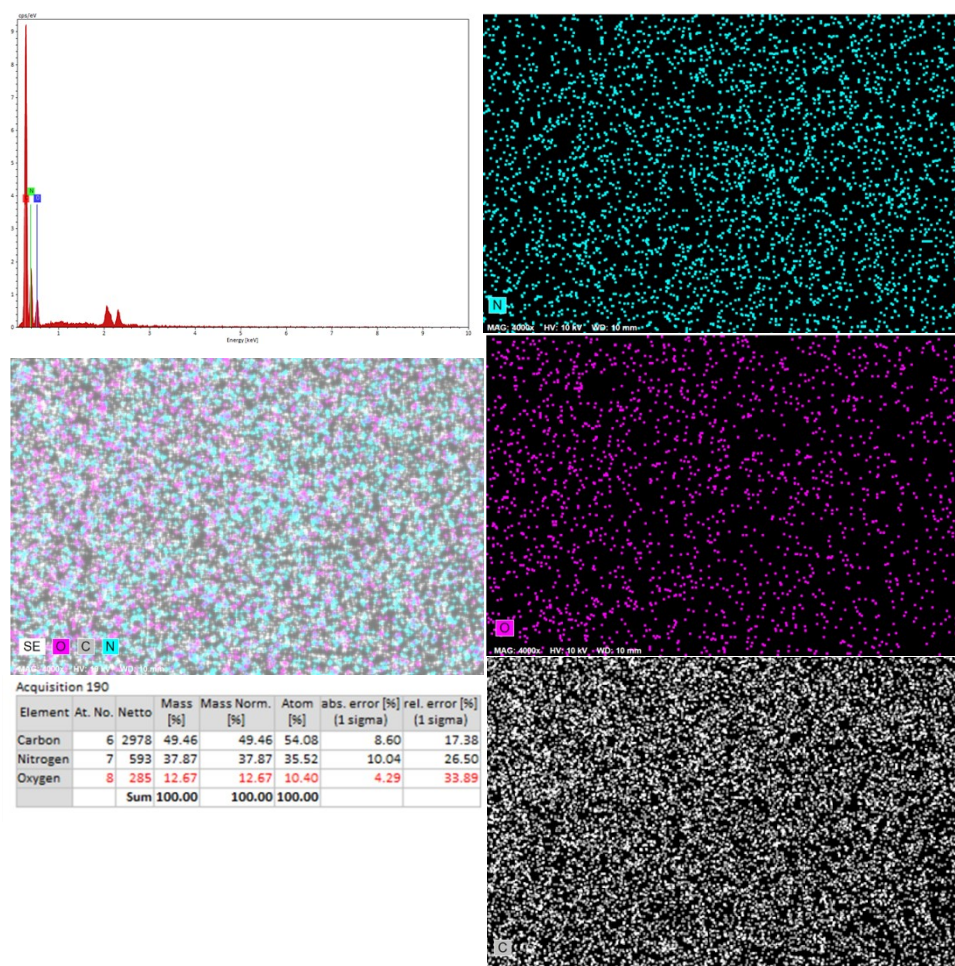

Figure

S1. (a)

EDS dot mapping of different elements present in PMF/OCNT composite.

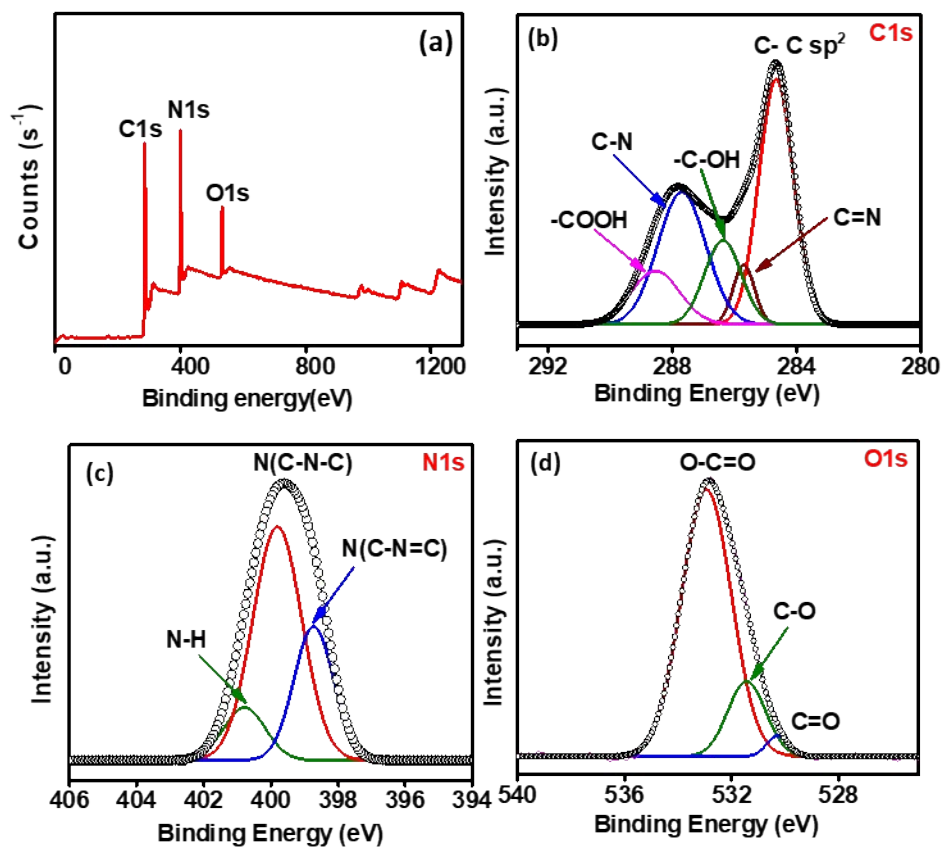

**Figure S2.** (a) XPS survey spectra and deconvoluted XPS spectra of (b) C1s (c) N1s (d) O1s of PMF/OCNT composite.

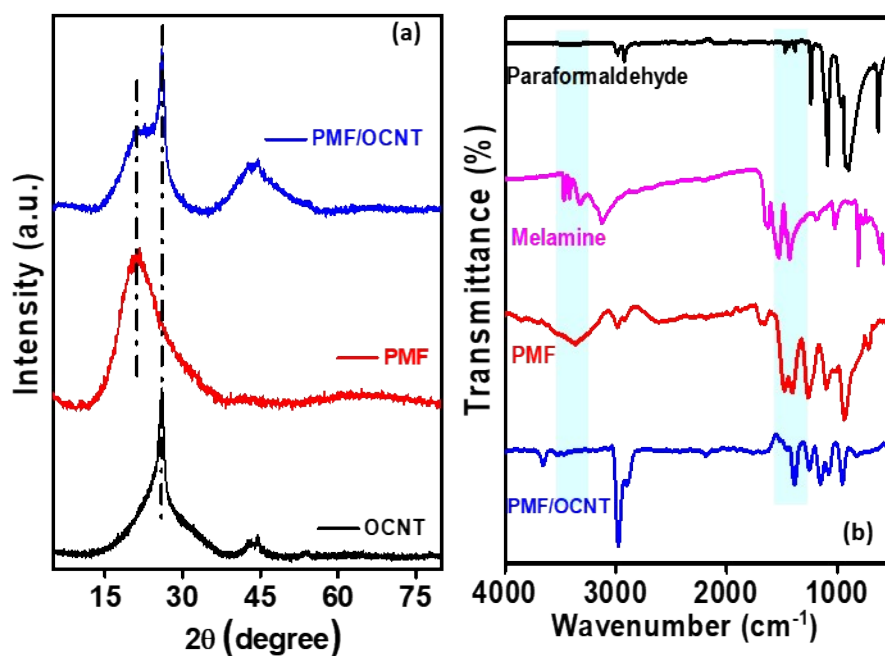

**Figure S3.** (a) XRD pattern of PMF, OCNTs and PMF/OCNT composite (b) FTIR spectra of PMF and melamine and PMF/OCNT composite.

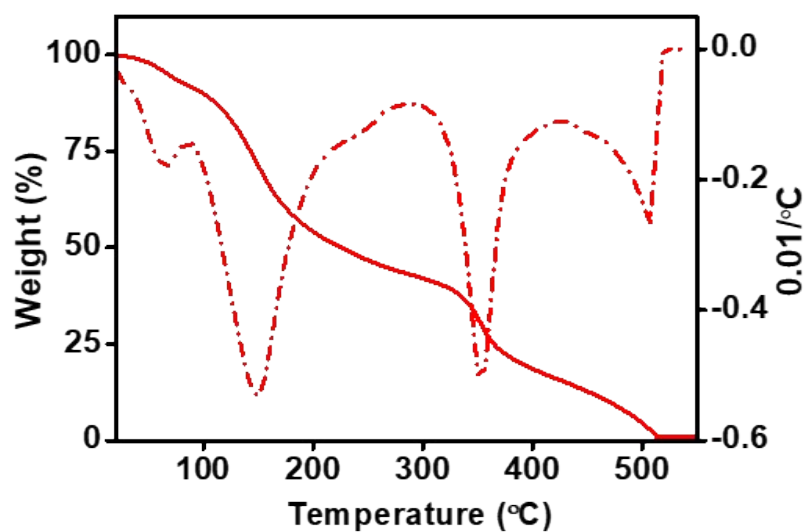

**Figure S4.** TGA curve and 1<sup>st</sup> derivative showing the weight loss of paraformaldehyde.

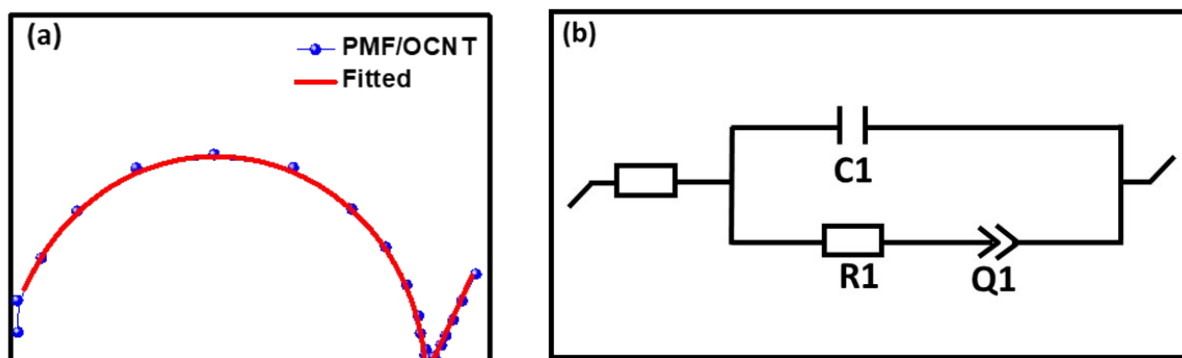

**Figure S5.** (a) Fitted EIS for PMF/OCNT (b) Corresponding equivalent circuit

**Table S1: Charge transfer resistance extracted from EIS spectra.**

| Material | $R_{ct}$ |
|----------|----------|
| Bare     | 283      |
| PMF      | 182      |
| PMF/OCNT | 123      |

### Electrochemical surface area (ECSA)

Electrochemically active surface area of the catalyst was determined by calculating the double-layer pseudo-capacitance ( $C_{dl}$ ) in the non-faradaic region in 50 mM BR buffer with an analyte solution. CV was performed in non-faradic region/double-layer region in potential range from 0.00 V to 0.40 V vs. Ag/AgCl/3 M KCl at various scan rates (25 to 350  $\text{mV s}^{-1}$ ). The slope of the plot between averaged current density of anodic and cathodic current  $(I_a + I_c)/2$  (where, 'a' denotes anodic current and 'c' is for cathodic current) vs. the scan rate at 0.199 V vs. Ag/AgCl/3 M KCl gives pseudo capacitance was dividing with the specific capacitance ( $C_s$ ) of the flat standard surface (20-60  $\mu\text{F cm}^{-2}$ ), which is considered to be 40  $\mu\text{F cm}^{-2}$ , gives electrochemical surface area (ECSA).

$$\text{ECSA} = C_{dl} / C_s$$

**Table S2: Electrochemical surface area (ECSA) analysis.**

| Sample | Catalyst | $C_{dl}$ ( $\mu F$ ) at 0.199 V vs. Ag/AgCl | ECSA ( $cm^2$ ) |
|--------|----------|---------------------------------------------|-----------------|
| 1.     | PMF      | 2200                                        | 32.5 $cm^2$     |
| 2.     | PMF/OCNT | 1300                                        | 50 $cm^2$       |

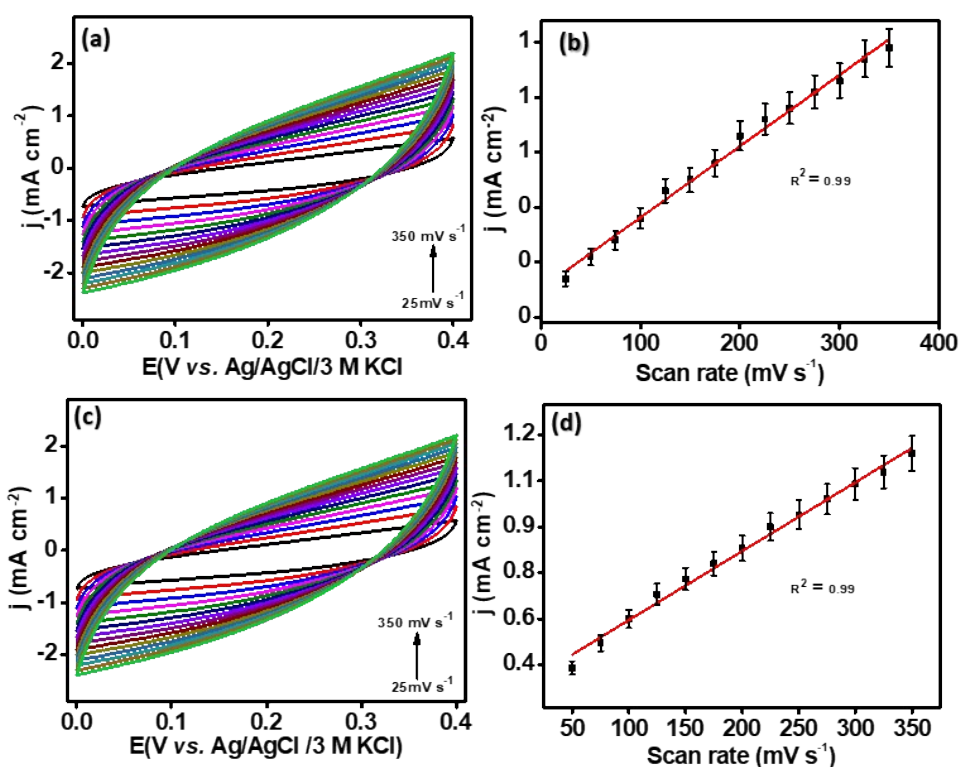

**Figure S6.** (a) & (c) Cyclic voltammograms of PMF and PMF/OCNT composite at varying scan rates in the non-faradic potential region and (b)&(d) corresponding average current densities respectively vs. scan rate at varying scan rates ranging from 25 to 350  $mVs^{-1}$ .

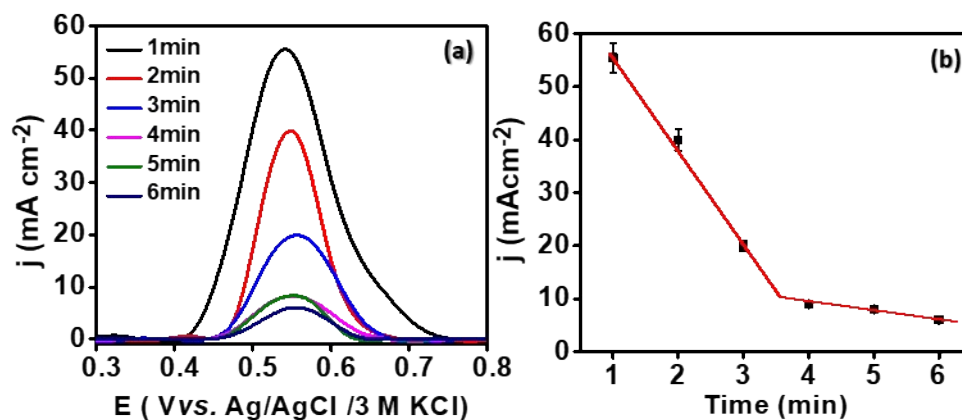

**Figure S7.** (a) SWV of for PMF/OCNT composite in 50 mM of BR Buffer(pH-1) containing 100  $\mu$ M capsaicin. (b) corresponding calibration curve.

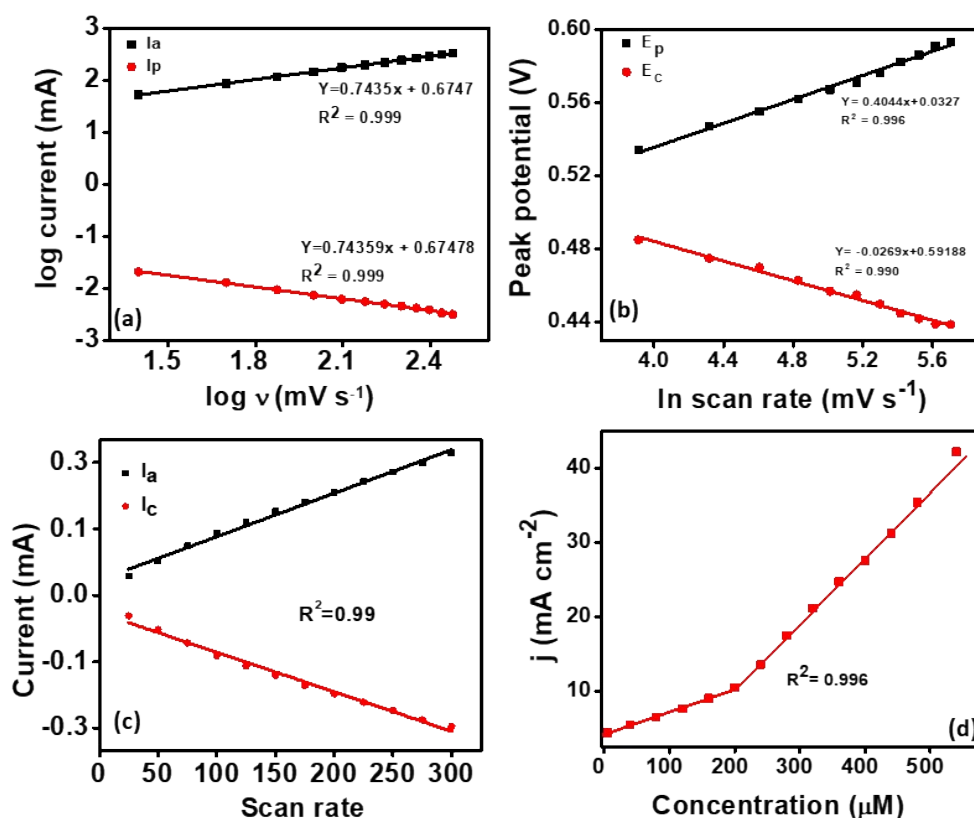

**Figure S8.** (a) Plot for Oxidation/Reduction peak current against the logarithm of scan rate (b) Plot for Oxidation/Reduction peak potential against the logarithm of scan rate plot for Oxidation/Reduction Peak current in 50 mM BR buffer (pH 1.0) containing 100  $\mu$ M Capsaicin(c) calibration plot of peak current vs scan rate at varying scan rates extracted from cyclic voltammogram (Fig. 3f) (d) Calibration plot of current density and concentration of capsaicin for PMF/OCNT composite extracted from cyclic voltammogram (Fig. 4b).

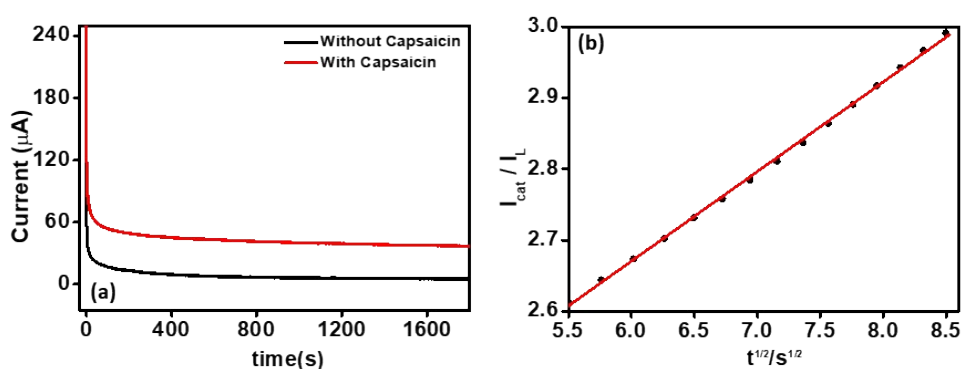

**Figure S9.** (a) Chronoamperometric curves of PMF/OCNT composite in BR buffer (pH 1.00) with and without 100  $\mu\text{M}$  capsaicin and (b) plot of  $I_{\text{Cat}}/I_{\text{L}}$  vs.  $t^{1/2}$  from the chronoamperometric curves.

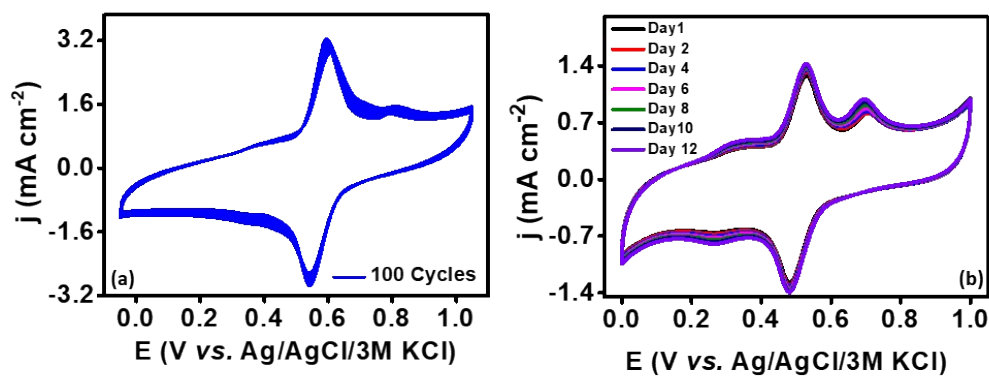

**Figure S10.** Cyclic voltammogram showing (a) stability of PMF/OCNT composite over continuous 100 cycles (b) Long term storage stability of sensor towards electrooxidation of capsaicin in 50 mM BR buffer pH 1.0 containing 100  $\mu\text{M}$  of capsaicin at a scan rate of 50  $\text{mV s}^{-1}$ .

**Table S3.** Comparison of analytical performance of PMF/OCNT composite towards capsaicin detection with the previously reported literature.

| Electrode                          | Detection Method  | Linear Range ( $\mu\text{M}$ ) | Lowest Detection Limit ( $\mu\text{M}$ ) | Sensitivity ( $\text{mA } \mu\text{M}^{-1} \text{cm}^{-2}$ )                                   | Literature |
|------------------------------------|-------------------|--------------------------------|------------------------------------------|------------------------------------------------------------------------------------------------|------------|
| MWCNT/BPPGE                        | ADsSV             | 0.5-15 & 15-60                 | 0.31                                     | -                                                                                              | 1          |
| BDD                                | ADsSV             | 0.16-20                        | 0.034                                    | -                                                                                              | 2          |
| NH <sub>2</sub> -FMS               | LSV               | 0.04-0.40 & 0.40-4.0           | 0.020                                    | -                                                                                              | 3          |
| MCFs                               | DPV               | 0.76-11.65                     | 0.08                                     | -                                                                                              | 4          |
| GO/Ti/Nafion                       | LSV               | 0.03-10.0                      | 0.0086                                   | -                                                                                              | 5          |
| PAL/ Nafion/MWCNTs                 | DPV               | 20-100                         | 0.61                                     | -                                                                                              | 6          |
| EDI-SPE                            | LSV               | 5-100 $\mu\text{M}$            | 2.88                                     | -                                                                                              | 7          |
| HRP/SPE                            | Chronoamperometry | 0.75-25                        | 0.30                                     | -                                                                                              | 8          |
| Ppy/Bi <sub>2</sub> O <sub>3</sub> | SWV               | 0.26-2.6                       | 0.059                                    | -                                                                                              | 9          |
| CNTs/RuNPs                         | SWV               | 0.010-0.41                     | 0.41                                     | -                                                                                              | 10         |
| Mn-SeNP                            | DPV               | 5.0-128                        | 0.050                                    | 2.41 $\mu\text{A } \mu\text{M}^{-1} \text{cm}^{-2}$                                            | 11         |
| Unmodified SPE                     | DPV               | 0.16-16                        | 0.050                                    | -                                                                                              | 12         |
| TiO <sub>2</sub> NPs               | CV                | 6.0-75 & 12-138                | 5.34 & 11.3                              | -                                                                                              | 13         |
| Y <sub>2</sub> O <sub>3</sub> NPs  | DPV               | 1.0 & 80                       | -                                        | -                                                                                              | 14         |
| PDDA/rGO/Pd                        | CV, DPV           | 0.32-64                        | 0.10                                     | -                                                                                              | 15         |
| IL/ rGO/Nafion                     | LSV               | 0.030-10                       | 0.0032                                   | -                                                                                              | 16         |
| Sn/rGO                             | CV                | 0.2-22                         | 0.005                                    | -                                                                                              | 17         |
| 10% CB                             | DPV               | 0.080-60                       | 0.028                                    | -                                                                                              | 18         |
| N-doped GrNPs                      | DPV               | 1-100                          | 0.37                                     | -                                                                                              | 19         |
| Pencil Graphite                    | AdsSV             | 0.016-0.32                     | 0.0037                                   | -                                                                                              | 20         |
| $\beta$ -CD/CPE                    | AdSV              | 1.3-9.3                        | 0.21                                     | -                                                                                              | 21         |
| Fe <sup>III</sup> -HMOF-5          | CV, DPV           | 1-60                           | 0.4                                      | -                                                                                              | 22         |
| Ru(bpy) <sub>3</sub> <sup>2+</sup> | CV                | 0.01-100                       | 0.094                                    | -                                                                                              | 23         |
| PMF/OCNT                           | CV, SWV, EIS      | 0.1-240 & 240-500              | 0.071 & 0.085                            | 960 $\mu\text{A } \mu\text{M} \text{cm}^{-2}$ & 2900 $\mu\text{A } \mu\text{M} \text{cm}^{-2}$ | This work  |

**Table S4.** Determination of Capsaicin in different real samples using PMF/OCNT composite.



| Sample             | Analyte   | Actual conc.      | Conc. (added)     | Conc. (found)       | SHU  | Recovery (%) |
|--------------------|-----------|-------------------|-------------------|---------------------|------|--------------|
| Fresh Green Pepper | Capsaicin | 102 $\mu\text{M}$ | 100 $\mu\text{M}$ | 216 $\mu\text{M}$   | 1055 | 114          |
| Belle Pepper       | Capsaicin | 70 $\mu\text{M}$  | 70 $\mu\text{M}$  | 139.5 $\mu\text{M}$ | 681  | 99.2         |
| Cayenne pepper     | Capsaicin | 54 $\mu\text{M}$  | 50 $\mu\text{M}$  | 109.4 $\mu\text{M}$ | 534  | 110          |

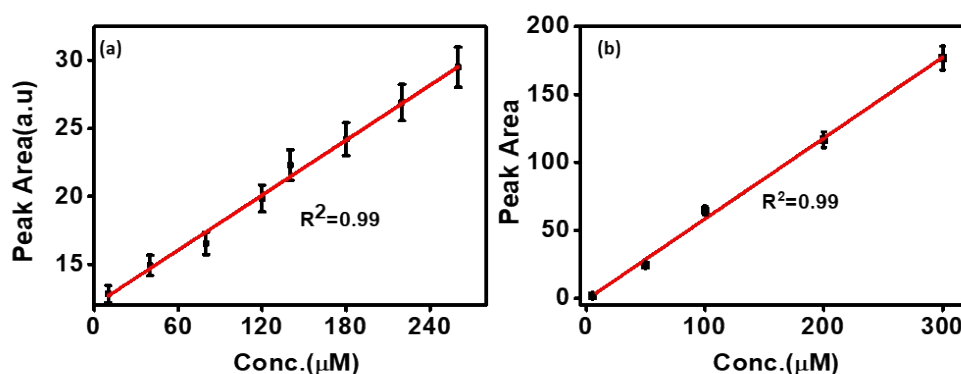

**Figure S11.** Calibration curve between concentration and peak area with (a) Electrochemical method (b) HPLC after the addition of standard sample of capsaicin .

**Table S5.** Comparison of results obtained by electrochemical method with HPLC for real sample.

| Sample             | Analyte   | Electrochemical method conc.( $\mu\text{M}$ ) | HPLC conc.( $\mu\text{M}$ ) | Relative Error (%) |
|--------------------|-----------|-----------------------------------------------|-----------------------------|--------------------|
| Fresh Green Pepper | Capsaicin | 216 $\mu\text{M}$                             | 230 $\mu\text{M}$           | 6.09 %             |
| Belle Pepper       | Capsaicin | 139 $\mu\text{M}$                             | 143 $\mu\text{M}$           | 4%                 |
| Cayenne pepper     | Capsaicin | 109 $\mu\text{M}$                             | 106 $\mu\text{M}$           | -3%                |

## References

1. R. T. Kachoosangi, G. G. Wildgoose and R. G. Compton, *Analyst*, 2008, **133**, 888-895.
2. Y. Yardim, *Electroanalysis*, 2011, **23**, 2491-2497.
3. Y. Ya, L. Mo, T. Wang, Y. Fan, J. Liao, Z. Chen, K. S. Manoj, F. Fang, C. Li and J. Liang, *Colloids Surf .B.*, 2012, **95**, 90-95.
4. Z. Xue, C. Hu, H. Rao, X. Wang, X. Zhou, X. Liu and X. Lu, *Anal. Methods*, 2015, **7**, 1167-1174.
5. D.-H. Kim and W.-Y. Lee, *J. Electroanal. Chem.*, 2016, **776**, 74-81.
6. M. I. Sabela, T. Mpanza, S. Kanchi, D. Sharma and K. Bisetty, *Biosens. Bioelectron.*, 2016, **83**, 45-53.
7. G. D. Pierini, C. W. Foster, S. J. Rowley-Neale, H. Fernández and C. E. Banks, *Analyst*, 2018, **143**, 3360-3365.
8. R. Mohammad, M. Ahmad and L. Y. Heng, *Sens. Actuators B: Chem.*, 2017, **241**, 174-181.
9. A. Verma and R. Jain, *J. Electrochem. Soc.*, 2017, **164**, H908.
10. A. K. Baytak and M. Aslanoglu, *Food Chem.*, 2017, **228**, 152-157.
11. R. Sukanya, M. Sakthivel, S.-M. Chen, T.-W. Chen, F. M. Al-Hemaid, M. A. Ali and M. S. Elshikh, *Microchimica Acta*, 2018, **185**, 1-9.
12. W. Lyu, X. Zhang, Z. Zhang, X. Chen, Y. Zhou, H. Chen, H. Wang and M. Ding, *Sens. Actuators B: Chem.*, 2019, **288**, 65-70.
13. M. Sarma and M. del Valle, *Electroanalysis*, 2020, **32**, 230-237.
14. H. Naskar, B. Ghatak, S. Biswas, B. Tudu, R. Bandyopadhyay and P. Pramanik, 2019.
15. F. Zhong, Z. Liu, Y. Han and Y. Guo, *Electroanalysis*, 2019, **31**, 1182-1188.
16. D.-H. Kim, S. Nam, J. Kim and W.-Y. Lee, *J. Electrochem. Sci. Technol*, 2019, **10**, 177-184.
17. W. Numphud, O. Chienthavorn and W. Siriwatcharapiboon, *Sci. Asia*, 2020, **46**, 586-+.
18. P. B. Deroco, O. Fatibello-Filho, F. Arduini and D. Moscone, *Electrochim. Acta*, 2020, **354**, 136628.
19. A. Soleh, K. Saisahas, K. Promsuwan, P. Thavarungkul, P. Kanatharana and W. Limbut, *ACS Appl. Nano Mater.*, 2020, **3**, 10094-10104.
20. Y. Yardim and Z. Şentürk, *Talanta*, 2013, **112**, 11-19.
21. Q. Gu, C. Lu, K. Chen, X. Chen, P. Ma, Z. Wang and B. Xu, *Foods*, 2021, **10**, 1743.
22. X. Fang and R. Duan, *Frontiers in chemistry*, 2022, **10**.
23. S. J. Lee and W.-Y. Lee, *J. Electroanal. Chem.*, 2022, 116169.
